# Supplementary material
Source: PubMed Central journal article supplement (PMC3307311)
Supplement: supp_M111.303701_jbc.M111.303701-1.pdf [file supp_M111.303701_jbc.M111.303701-1.pdf]

## Supplemental tables

TABLE S1. *Saccharomyces cerevisiae* strains used in this study

| Strain | Genotype                                           | Source                   |
|--------|----------------------------------------------------|--------------------------|
| MCY96  | <i>MATa his3 leu2 lys2 trp1 ura3</i>               | Y.-S. Shiau, unpublished |
| MCY97  | <i>MATa his3 leu2 lys2 trp1 ura3</i>               | Y.-S. Shiau, unpublished |
| MCY99  | MCY97 <i>avo3-1<sup>ts</sup></i>                   | Ho et al., 2008          |
| MCY100 | MCY97 <i>avo3-2<sup>ts</sup></i>                   | Ho et al., 2008          |
| MCY116 | MCY97 <i>3HA-TOR2::KanMX6</i>                      | Ho et al., 2008          |
| MCY117 | MCY97 <i>AVO1-13myc::HIS3MX6</i>                   | Ho et al., 2008          |
| MCY118 | MCY97 <i>LST8-13myc::HIS3MX6</i>                   | Ho et al., 2008          |
| MCY120 | MCY116 [pRS316- <i>AVO1-13myc</i> ]                | Ho et al., 2008          |
| MCY121 | MCY97 <i>3HA-TOR2::KanMX6 AVO2-13myc::HIS3MX6</i>  | Ho et al., 2008          |
| MCY122 | MCY97 <i>3HA-TOR2::KanMX6 LST8-13myc::HIS3MX6</i>  | Ho et al., 2008          |
| MCY123 | MCY97 <i>3HA-TOR2::KanMX6 AVO3-13myc::HIS3MX6</i>  | Ho et al., 2008          |
| MCY127 | MCY116 <i>avo2Δ::HIS3MX6 bit61Δ::LEU2</i>          | Ho et al., 2008          |
| MCY135 | MCY97 <i>3HA-TOR2::KanMX6 BIT61-13myc::HIS3MX6</i> | Ho et al., 2008          |
| MCY142 | MCY97 <i>YPK2-13myc::HIS3MX6</i>                   | This study               |
| MCY215 | MCY99 <i>3HA-TOR2::KanMX6</i>                      | Ho et al., 2008          |
| MCY218 | MCY215 [pRS316- <i>AVO1-13myc</i> ]                | Ho et al., 2008          |
| MCY257 | MCY99 <i>YPK2-13myc::HIS3MX6</i>                   | This study               |
| MCY315 | MCY100 <i>3HA-TOR2::KanMX6</i>                     | Ho et al., 2008          |
| MCY318 | MCY315 [pRS316- <i>AVO1-13myc</i> ]                | Ho et al., 2008          |
| MCY334 | MCY100 <i>YPK2-13myc::HIS3MX6</i>                  | This study               |

TABLE S2. Plasmids used in this study

| Plasmid        | Description                                                                                                                                          | Source                 |
|----------------|------------------------------------------------------------------------------------------------------------------------------------------------------|------------------------|
| pTSS1          | <i>AVO3</i> in pRS424 (2 $\mu$ , <i>TRP1</i> )                                                                                                       | Ho et al., 2005 (1)    |
| pHS2           | <i>AVO1</i> in pRS424 (2 $\mu$ , <i>TRP1</i> )                                                                                                       | Ho et al., 2005 (1)    |
| pHS5           | <i>AVO2</i> in pRS424 (2 $\mu$ , <i>TRP1</i> )                                                                                                       | Ho et al., 2005 (1)    |
| pHS9           | pRS316 containing an expression cassette of C-terminal 13Myc-tagged Avo1p driven by the endogenous <i>AVO1</i> promoter ( <i>CEN</i> , <i>URA3</i> ) | Ho et al., 2008 (2)    |
| pGAL1-GST-URA3 | Expressing GST under the control of the <i>GAL1</i> promoter (2 $\mu$ , <i>URA3</i> )                                                                | J.-J. Lin, unpublished |
| pHC1           | A <i>YPK2</i> fragment in pRS424 (2 $\mu$ , <i>TRP1</i> ) to express Ypk2 <sup>ΔN</sup> (i.e. Ypk2 with truncation of the N-terminal 224 aa)         | This study             |
| pHC2           | Full-length <i>YPK2</i> in pGAL1-GST-URA3 (2 $\mu$ , <i>URA3</i> ) to express GST-Ypk2                                                               | This study             |
| pHC3           | A <i>YPK2</i> fragment in pGAL1-GST-URA3 (2 $\mu$ , <i>URA3</i> ) to express GST-Ypk2 <sup>1-618</sup>                                               | This study             |
| pHC4           | A <i>YPK2</i> fragment in pGAL1-GST-URA3 (2 $\mu$ , <i>URA3</i> ) to express GST-Ypk2 <sup>1-466</sup>                                               | This study             |
| pHC5           | A <i>YPK2</i> fragment in pGAL1-GST-URA3 (2 $\mu$ , <i>URA3</i> ) to express GST-Ypk2 <sup>1-333</sup>                                               | This study             |
| pHC6           | A <i>YPK2</i> fragment in pGAL1-GST-URA3 (2 $\mu$ , <i>URA3</i> ) to express GST-Ypk2 <sup>101-677</sup>                                             | This study             |
| pHC7           | A <i>YPK2</i> fragment in pGAL1-GST-URA3 (2 $\mu$ , <i>URA3</i> ) to express GST-Ypk2 <sup>224-677</sup>                                             | This study             |
| pHC8           | A <i>YPK2</i> fragment in pGAL1-GST-URA3 (2 $\mu$ , <i>URA3</i> ) to express GST-Ypk2 <sup>334-677</sup>                                             | This study             |
| pHC9           | A <i>YPK2</i> fragment in pGAL1-GST-URA3 (2 $\mu$ , <i>URA3</i> ) to express GST-Ypk2 <sup>467-677</sup>                                             | This study             |
| pHC10          | Full-length <i>YPK2</i> in pGEX2T                                                                                                                    | This study             |
| pHC11          | Full-length <i>AVO1</i> in yTA                                                                                                                       | This study             |
| pHC12          | Full-length <i>LST8</i> in pcDNA3.1                                                                                                                  | This study             |
| pHC13          | Full-length <i>AVO3</i> in pSG1                                                                                                                      | This study             |
| pHC14          | An <i>AVO1</i> fragment encoding Avo1 <sup>1-1066</sup> in yTA                                                                                       | This study             |
| pHC15          | An <i>AVO1</i> fragment encoding Avo1 <sup>1-840</sup> in yTA                                                                                        | This study             |

|       |                                                                                                                                                                                                |            |
|-------|------------------------------------------------------------------------------------------------------------------------------------------------------------------------------------------------|------------|
| pHC16 | An <i>AVO1</i> fragment encoding Avo1 <sup>1-400</sup> in yTA                                                                                                                                  | This study |
| pHC17 | An <i>AVO1</i> fragment encoding Avo1 <sup>1-200</sup> in yTA                                                                                                                                  | This study |
| pHC18 | An <i>AVO1</i> fragment encoding Avo1 <sup>400-1176</sup> in yTA                                                                                                                               | This study |
| pHC19 | An <i>AVO1</i> fragment encoding Avo1 <sup>600-1176</sup> in yTA                                                                                                                               | This study |
| pHC20 | An <i>AVO1</i> fragment encoding Avo1 <sup>840-1176</sup> in yTA                                                                                                                               | This study |
| pHC21 | An <i>AVO1</i> fragment encoding Avo1 <sup>600-840</sup> in pACT2                                                                                                                              | This study |
| pHC22 | Full-length <i>YPK2</i> in pGBKT7                                                                                                                                                              | This study |
| pHC23 | A <i>YPK2</i> fragment encoding Ypk2 <sup>1-618</sup> in pGBKT7                                                                                                                                | This study |
| pHC24 | A <i>YPK2</i> fragment encoding Ypk2 <sup>1-466</sup> in pGBKT7                                                                                                                                | This study |
| pHC25 | A <i>YPK2</i> fragment encoding Ypk2 <sup>1-333</sup> in pGBKT7                                                                                                                                | This study |
| pHC26 | A <i>YPK2</i> fragment encoding Ypk2 <sup>101-677</sup> in pGBKT7                                                                                                                              | This study |
| pHC27 | A <i>YPK2</i> fragment encoding Ypk2 <sup>224-677</sup> in pGBKT7                                                                                                                              | This study |
| pHC28 | A <i>YPK2</i> fragment encoding Ypk2 <sup>334-677</sup> in pGBKT7                                                                                                                              | This study |
| pHC29 | A <i>YPK2</i> fragment encoding Ypk2 <sup>467-677</sup> in pGBKT7                                                                                                                              | This study |
| pHC30 | Full-length <i>YPK2</i> in pMAL-C2                                                                                                                                                             | This study |
| pHC31 | A <i>YPK2</i> fragment in pGAL1-GST-URA3 to express GST-Ypk2 <sup>224-677KD</sup> (i.e. a kinase-dead version of Ypk2 <sup>224-677</sup> with a point mutation changing Lys373 of Ypk2 to Ala) | This study |

### Supplemental References

1. Ho, H. L., Shiau, Y. S., and Chen, M. Y. (2005) *Curr. Genet.* **47**, 273-288
2. Ho, H. L., Lee, H. Y., Liao, H. C., and Chen, M. Y. (2008) *Eukaryot Cell* **7**, 1328-1343
